# Supplementary material for: Using a Machine Learning Approach to Predict Outcomes after Radiosurgery for Cerebral Arteriovenous Malformations
Source: PubMed Central journal article supplement (PMC4746661; doi:10.1038/srep21161), 2016-02-09
Supplement: srep21161-s1.pdf [file srep21161-s1.pdf]

# Using a Machine Learning Approach to Predict Outcomes after Radiosurgery for Cerebral Arteriovenous Malformations

Eric Karl Oermann, M.D.<sup>1†</sup>, Alex Rubinsteyn, Ph.D.<sup>2†</sup>, Dale Ding, M.D.<sup>3</sup>, Justin Mascitelli, M.D.<sup>1</sup>, Robert M. Starke, M.D., M.Sc.<sup>3</sup>, Joshua B. Bederson, M.D.<sup>1</sup>, Hideyuki Kano, M.D., Ph.D.<sup>4</sup>, L Dade Lunsford, M.D.<sup>4</sup>, Jason P. Sheehan, M.D., Ph.D.<sup>3</sup>, Jeffrey Hammerbacher, B.S.<sup>2</sup>, Douglas Kondziolka, M.D., M.Sc.<sup>5\*</sup>

<sup>1</sup>Department of Neurosurgery, Icahn School of Medicine at Mount Sinai, New York City, NY, USA

<sup>2</sup>Department of Genetics and Genomic Sciences, Icahn School of Medicine at Mount Sinai, New York City, NY, USA

<sup>3</sup>Department of Neurosurgery, University of Virginia Medical Center, Charlottesville, VA, USA

<sup>4</sup>Department of Neurosurgery, University of Pittsburgh Medical Center, Pittsburgh, PA, USA

<sup>5</sup>Department of Neurosurgery, New York University Langone Medical Center, New York City, NY, USA

†These authors contributed equally to this work

\*Corresponding author

Corresponding Author contact information:

Douglas Kondziolka

New York University Langone Medical Center

Department of Neurosurgery

New York, NY 10016

Email [Douglas.Kondziolka@nyumc.org](mailto:Douglas.Kondziolka@nyumc.org)

| <b>Features</b>            | <b>Type</b>          | <b>Units</b>         |
|----------------------------|----------------------|----------------------|
| Age                        | Continuous           | years                |
| Associated aneurysm        | Categorical - Binary | yes/no               |
| Deep venous drainage       | Categorical - Binary | yes/no               |
| History of Hemorrhage      | Categorical - Binary | yes/no               |
| Isodose                    | Continuous           | percentage           |
| Location 1 – frontal       | Categorical - Binary | yes/no               |
| Location 2 – temporal      | Categorical - Binary | yes/no               |
| Location 3 – parietal      | Categorical - Binary | yes/no               |
| Location 4 – occipital     | Categorical - Binary | yes/no               |
| Location 5 – thalamic      | Categorical - Binary | yes/no               |
| Location 6 – basal ganglia | Categorical - Binary | yes/no               |
| Location 7 – callosal      | Categorical - Binary | yes/no               |
| Location 8 – brain stem    | Categorical - Binary | yes/no               |
| Location 9 – cerebellum    | Categorical - Binary | yes/no               |
| Marginal dose              | Continuous           | Grey (Gy)            |
| 3D surface dose            | Continuous           | Gy x mm <sup>2</sup> |
| Max dose                   | Continuous           | Grey (Gy)            |
| Maximum diameter           | Continuous           | millimeter (mm)      |
| Number of isocenters       | Ordinal              | natural numbers      |
| Prior embolization         | Categorical - Binary | yes/no               |
| Sex                        | Categorical - Binary | female/male          |
| Surgery                    | Categorical - Binary | yes/no               |
| Volume                     | Continuous           | mm <sup>3</sup>      |
